# Supplementary material for: A novel combination therapy for ER+ breast cancer suppresses drug resistance via an evolutionary double-bind
Source: PubMed Central journal article supplement — bioRxiv. 2024 Sep 6:2024.09.03.611032. Preprint. [Version 1] doi: 10.1101/2024.09.03.611032 (PMC11398327; doi:10.1101/2024.09.03.611032), 2024-09-06
Supplement: NIHPP2024.09.03.611032v1-supplement-1.pdf [file NIHPP2024.09.03.611032v1-supplement-1.pdf]

## Supplemental Information

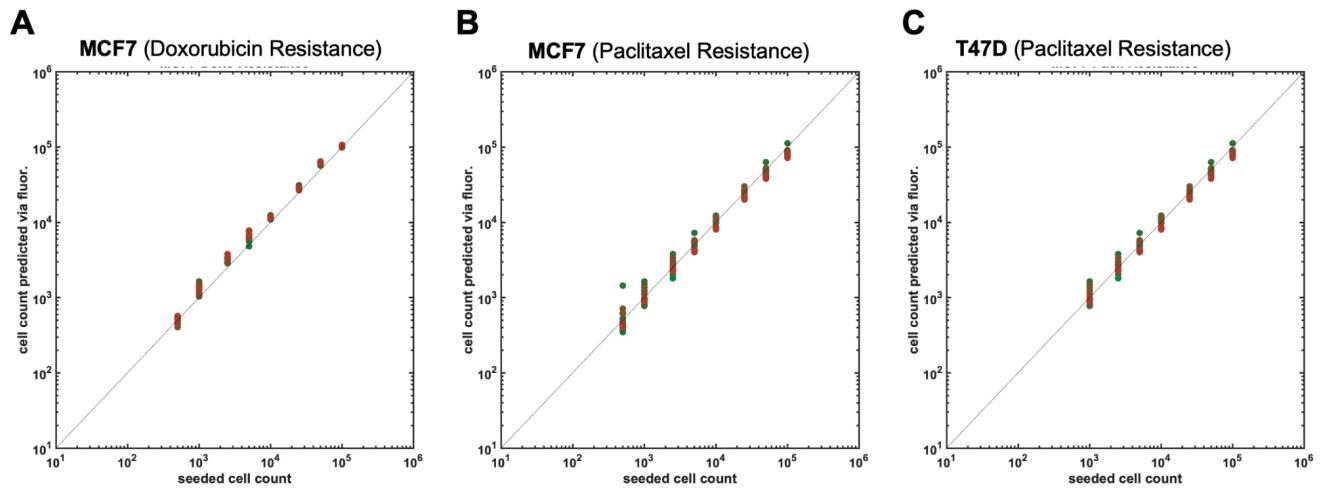

**Figure S1:** Validation of fluorescence intensity,  $F$ , to cell count,  $N$ , equation (see Methods). Known values of cells seeded (x-axis) are compared to predicted cell counts based on measured fluorescence intensity (y-axis). The model provides accurate cell count predictions, falling on the unity line (black line) across all initial sensitive-to-resistant ratios (color), repeated for (a) MCF7 DoxoR, (b) MCF7 PaclR, and (c) T47D PaclR lines.
